# Supplementary material for: Rich synthetic and structural chemistry of polynuclear Pb(ii)–Cu(i)/Ag(i) heterobimetallic thiolate clusters, their decomposition and generation of a Cu(ii) hydrosulfide variant
Source: Royal Society of Chemistry journal article supplement (doi:10.1039/c5ra15195c), 2015-01-01
Supplement: c5ra15195c1.pdf [file c5ra15195c1.pdf]

## Supporting Information

To the paper entitled

**Rich synthetic and structural chemistry of polynuclear Pb(II)-Cu(I)/Ag(I)  
heterobimetallic thiolate clusters, their decomposition and generation of a Cu(II)  
hydrosulfide variant**

Geetika Gupta and Subrato Bhattacharya\*

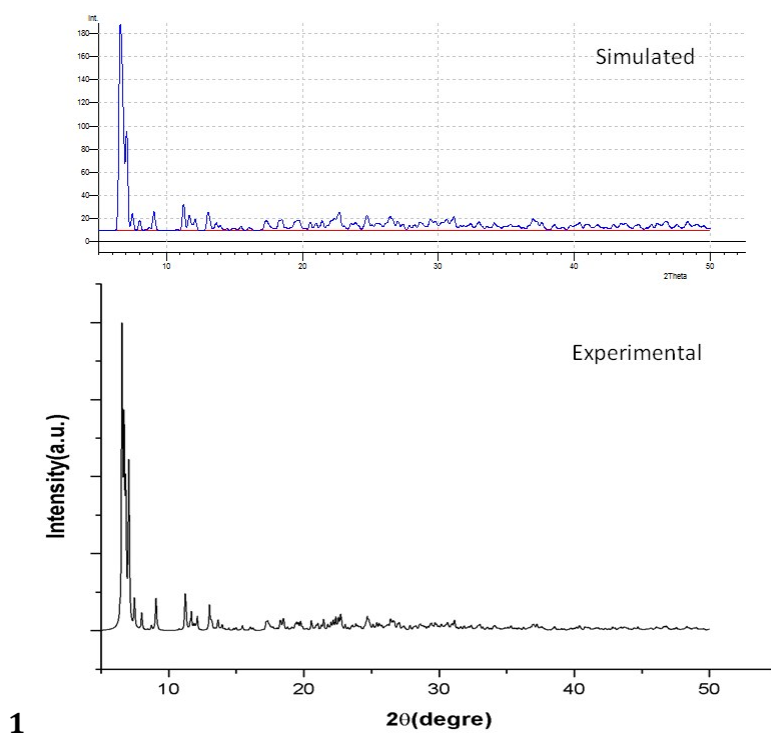

Figure S1. Experimental and simulated powder X-ray diffraction pattern of **1**.

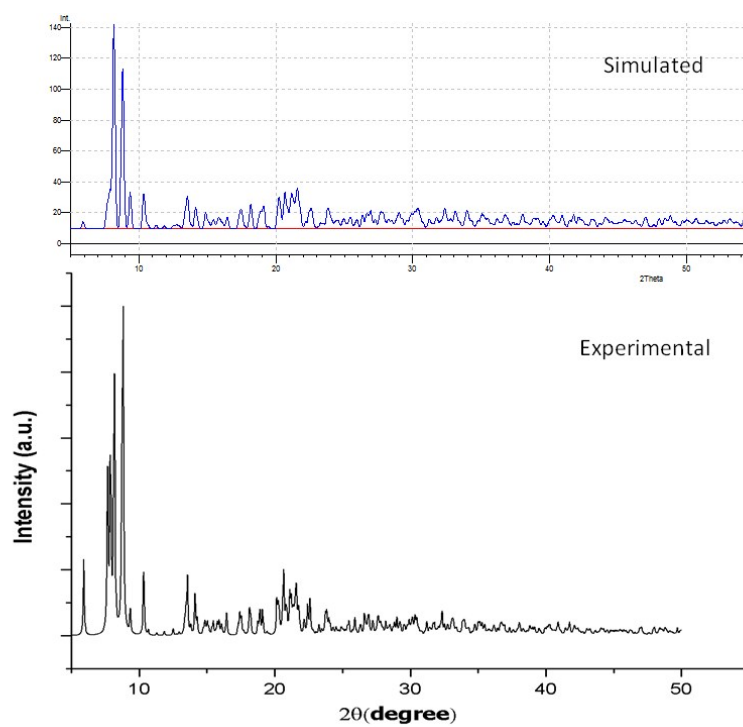

Figure S2. Experimental and simulated powder X-ray diffraction pattern of **2**.

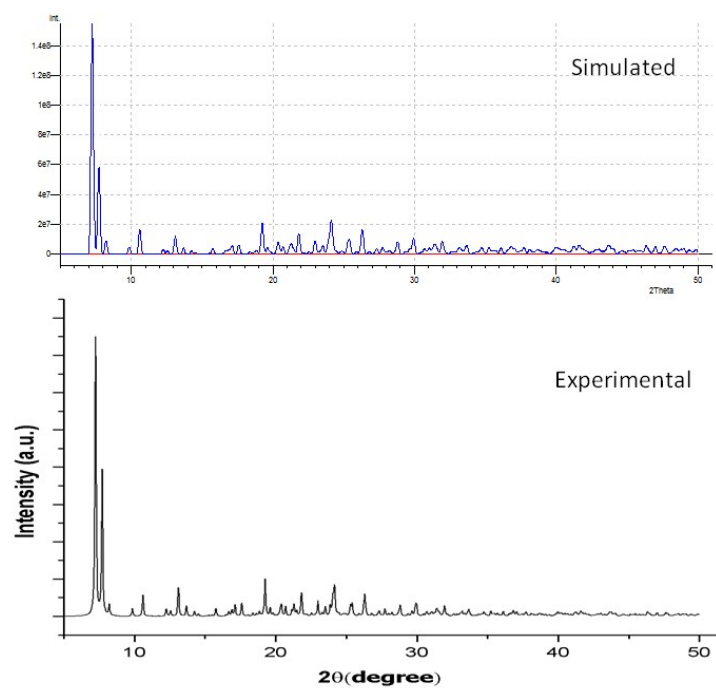

Figure S3. Experimental and simulated powder X-ray diffraction pattern of **3**.

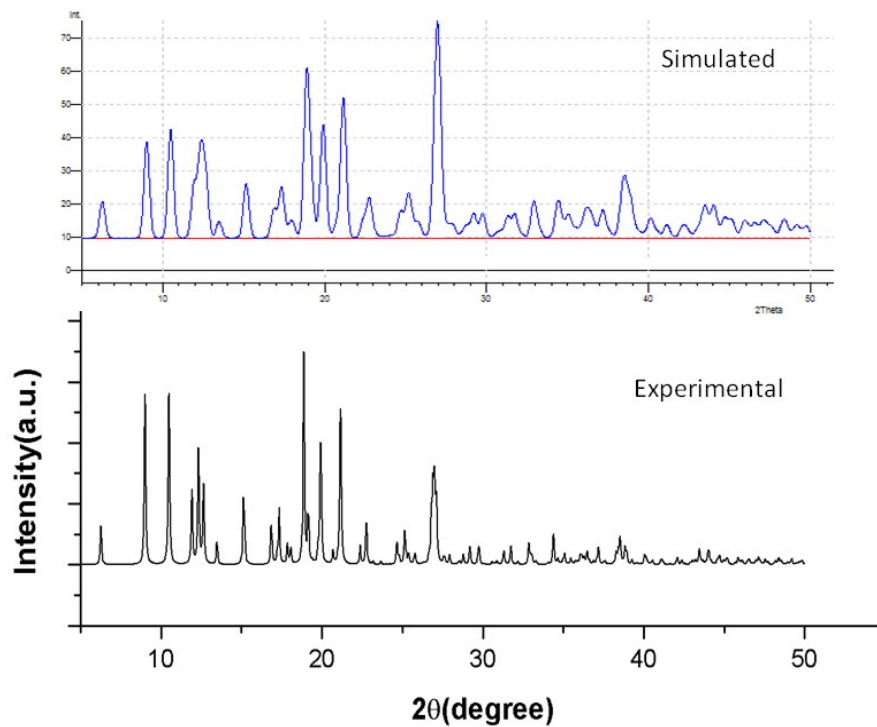

Figure S4. Experimental and simulated powder X-ray diffraction pattern of **4**.
